# Supplementary material
Source: publisher figshare collection journal article supplement (https://acs.figshare.com/ndownloader/files/8248070)
Supplement: Supplementary file 1 [file 8248070]

# Supporting Information for: Controlling the Intermediate Structure of an Ionic Liquid for f-Block Element Separations

*Carter W. Abney,<sup>†\*</sup> Changwoo Do,<sup>‡</sup> Huimin Luo,<sup>†</sup> Joshua Wright,<sup>§||</sup> Lilin He,<sup>‡</sup> Sheng Dai<sup>¶||</sup>*

<sup>†</sup> Oak Ridge National Laboratory, One Bethel Valley Road, P.O. Box 2008, Oak Ridge, TN 37831, U.S.A.

<sup>‡</sup> Biology and Soft Matter Division, Neutron Sciences Directorate, Oak Ridge National Laboratory, P.O. Box 2008, Oak Ridge, TN 37831, U.S.A.

<sup>§</sup> Advanced Photon Source, Argonne National Laboratory, 9700 Cass Ave, Lemont, IL 60439, U.S.A.

<sup>||</sup> Illinois Institute of Technology, 3300 S. Federal St, Chicago, IL, 60616, U.S.A.

<sup>¶</sup> Department of Chemistry, University of Tennessee, Knoxville, TN 37966, U.S.A.

## Table of Contents:

|                                                                                                                                                                                                                                        |    |
|----------------------------------------------------------------------------------------------------------------------------------------------------------------------------------------------------------------------------------------|----|
| 1. General Experimental .....                                                                                                                                                                                                          | S3 |
| 2. SANS Data Collection and Processing .....                                                                                                                                                                                           | S3 |
| 3. XAFS Data Collection and Processing .....                                                                                                                                                                                           | S4 |
| 4. Derivation of Equation 1 .....                                                                                                                                                                                                      | S5 |
| 5. Supplementary Data and Figures .....                                                                                                                                                                                                | S6 |
| Figure S1: SANS Data for Control Samples .....                                                                                                                                                                                         | S6 |
| Table S1: Fit of SANS Data for TALSPEAK-contacted [P <sub>666(14)</sub> ][DEHP] / [C <sub>4</sub> mim][NTf <sub>2</sub> ] .....                                                                                                        | S6 |
| Table S2: Calculated Scattering Length Densities for Ionic Liquid Constituents .....                                                                                                                                                   | S7 |
| Table S3: Refined Fit Parameters for Simultaneous Fit of Protiated and Deuterated Data Sets with Solid Cylinder Model.....                                                                                                             | S7 |
| Table S4: Comparison of Fitted SANS Data from Contact of [P <sub>nnn(14)</sub> ][DEHP] / [C <sub>4</sub> mim][NTf <sub>2</sub> ] ( <i>n</i> = 4, 6) with TALSPEAK Simulant Containing 0.0025 M Lu(NO <sub>3</sub> ) <sub>3</sub> ..... | S7 |
| Table S5: Fit of SANS Data from Contact of [P <sub>666(14)</sub> ][DEHP] / [C <sub>4</sub> mim][NTf <sub>2</sub> ] with TALSPEAK Simulant Containing Different Lu(NO <sub>3</sub> ) <sub>3</sub> Concentrations.....                   | S7 |

|                                                                                                                                                             |    |
|-------------------------------------------------------------------------------------------------------------------------------------------------------------|----|
| Table S6: Fit Parameters for EXAFS data of Ionic Liquids Following Contact with TALSEPAK<br>simulant. ....                                                  | S8 |
| Table S7: Water content as a function of metal concentration for $[P_{666(14)}][DEHP]$ in $[C_4mim][NTf_2]$ as<br>determined by Karl-Fisher titration ..... | S8 |
| 6. References.....                                                                                                                                          | S8 |

## 1. General Experimental

All chemicals and solvents were reagent grade and were used without further purification. Trihexyltetradecylphosphonium bromide ( $[P_{666(14)}]Br$ ) was purchased from Aldrich, while HDEHP was purchased from Alfa Aesar.  $[C_4mim][NTf_2]$  and  $[P_{666(14)}][DEHP]$  were prepared as reported previously.<sup>1-2</sup> Water content was determined using an AQUAPAL III Karl-Fisher titrater. TALSPEAK simulant was prepared by dissolving  $Lu(NO_3)_3$  of varying concentrations in an aqueous 0.1 M glycolic acid solution with 0.01 M diethylenetriamine-N,N,N',N'',N'''-pentaacetic acid (DTPA), affording a solution with pH 3.24. Samples for SANS and XAFS investigations were prepared by contacting 1 mL of 0.4 M  $[P_{666(14)}][DEHP]$  in  $[C_4mim][NTf_2]$  with 1 mL TALSPEAK simulant for 60 minutes in a vibrating mixer. The samples were then centrifuged at an RCF of 11300 g for 5 minutes and the aqueous phase removed.

## 2. SANS Data Collection and Processing

SANS data were collected on Beamline-6, EQ-SANS, at the Spallation Neutron Source of Oak Ridge National Laboratory.<sup>3</sup> IL samples were transferred to quartz Helma cells possessing path lengths of 1 mm, then sealed with Teflon caps fastened with Parafilm. Data were collected at room temperature, with detectors located at 8 m, 4 m, and 1.3 m from the sample, corresponding to low, medium, and high  $q$ -range. The instrument was used in 60 Hz mode with minimum wavelengths of 10, 6, 1.5 Å, for 8m, 4m, and 1.3m detector locations respectively, to provide an effective  $q$ -range of  $\sim 0.003 \text{ \AA}^{-1}$  to  $1.5 \text{ \AA}^{-1}$ . Data were reduced and processed using MantidPlot using standard procedures to correct for detector sensitivity, instrument dark current, sample transmission and empty cell background.<sup>4</sup> Data fitting was performed using SasView 3.1.2 software (<http://www.sasview.org>).

### 3. XAFS Data Collection and Processing

XAFS data were collected on beamline 10-ID-B at the Advanced Photon Source of Argonne National Laboratory.<sup>5</sup> ILs contacted with 0.025 M and 0.010 M Lu(NO<sub>3</sub>)<sub>3</sub> in TALSPEAK simulant were sealed in a polyethylene sample vials, with spectra collected at the Lu L<sub>III</sub>-edge (9244 eV) at ambient temperature and pressure. Data were collected using a Lytle-type fluorescence detector. The x-ray white beam was monochromatized by a Si(111) monochromator with higher-order harmonics removed through use of a Rh harmonic rejection mirror. Due to the high flux and configuration of the beamline, the x-ray energy was varied at a constant rate across the absorption edge; neither step size nor dwell time changed as a function of energy; 200 scans were collected for each sample.

Data were processed and fit using the Athena and Artemis programs of the IFEFFIT package based on FEFF 6.<sup>6-7</sup> Upon importing, data were rebinned with grids of 10 eV, 0.5 eV, and 0.005 Å<sup>-1</sup> for the pre-edge region, near-edge region, and EXAFS region, respectively. Spectra were averaged in  $\mu(E)$  prior to normalization. The background was removed and the data were assigned an Rbkg value of 1.0 prior to normalizing to obtain a unit edge step. Data were fit with  $k^3$ -weighting, appropriate for a heavy absorbing element surrounded by light scatterers. The first shell of atoms coordinating the Lu absorber was determined using an Lu-O single scattering path at 2.20 Å. The amplitude reduction factor was set to 1, while fitted variables included the degeneracy of the scattering path ( $N_{\text{deg}}$ ), the change in the effective half-path length of the Lu-O scatterer ( $\Delta R$ ), the relative mean squared displacement of the scatterer ( $\sigma^2$ ), and the energy shift of the photoelectron ( $\Delta E_0$ ). For each fit, the number of variables was not permitted to exceed 2/3 the number of independent points, complying with the Nyquist criterion.<sup>8</sup>

#### 4. Derivation of Eq. 1

$f$  = Volume Fraction of Extracted Water

$\rho_{structure}$  = Scattering Length Density of Ionic Liquid Microstructural Feature

$\rho_{water}$  = Scattering Length Density of generic water

$\rho_{H_2O}$  = Specific Scattering Length Density of H<sub>2</sub>O ( $-0.56 \times 10^{-6} \text{ \AA}^{-2}$ )

$\rho_{D_2O}$  = Specific Scattering Length Density of D<sub>2</sub>O ( $6.39 \times 10^{-6} \text{ \AA}^{-2}$ )

$\rho_{(IL)}$  = Scattering Length Density of IL in Microstructure ( $0.5 \times \rho_{(C4mim)} + 0.5 \times \rho_{(DEHP)} = 0.67 \times 10^{-6} \text{ \AA}^{-2}$ )

The  $\rho_{structure}$  is equal to the  $\rho$  of the water in the structure plus the  $\rho$  of the IL in the structure, weighted by their corresponding volume fractions. With  $f$  defined as the volume fraction of extracted water, the remainder of the structure must be the IL.

$$\rho_{structure} = [f \times \rho_{water}] + [\rho_{(IL)} \times (1-f)] \quad (S1)$$

The value of  $\rho_{structure}$  can be defined by Eq. S1 for H<sub>2</sub>O and D<sub>2</sub>O, as provided in Eqs. S2 and S3, respectively.

$$\rho_{structure(H_2O)} = [f \times \rho_{H_2O}] + [\rho_{(IL)} \times (1-f)] \quad (S2)$$

$$\rho_{structure(D_2O)} = [f \times \rho_{D_2O}] + [\rho_{(IL)} \times (1-f)] \quad (S3)$$

Eq. S2 can be rearranged to afford an equation for  $f$ , provided in Eq. S4.

$$\rho_{structure(H_2O)} = f \times \rho_{H_2O} + \rho_{(IL)} - f \times \rho_{(IL)}$$

$$\rho_{structure(H_2O)} = f(\rho_{H_2O} - \rho_{(IL)}) + \rho_{(IL)}$$

$$f = \frac{\rho_{structure(H_2O)} - \rho_{(IL)}}{\rho_{H_2O} - \rho_{(IL)}} \quad (S4)$$

Having defined  $f$  as a function of  $\rho_{structure(H_2O)}$ , we substitute Eq. S4 into Eq. S3 to obtain Eq. 1 in the text, which relates  $\rho_{structure(H_2O)}$  to  $\rho_{structure(D_2O)}$  and allows simultaneous refinement of these values through data fitting.

$$\rho_{structure(D_2O)} = \frac{\rho_{structure(H_2O)} - \rho_{(IL)}}{\rho_{H_2O} - \rho_{(IL)}} \times (\rho_{D_2O} - \rho_{(IL)}) + \rho_{(IL)} \quad (1)$$

## 5. Supplementary Data and Figures

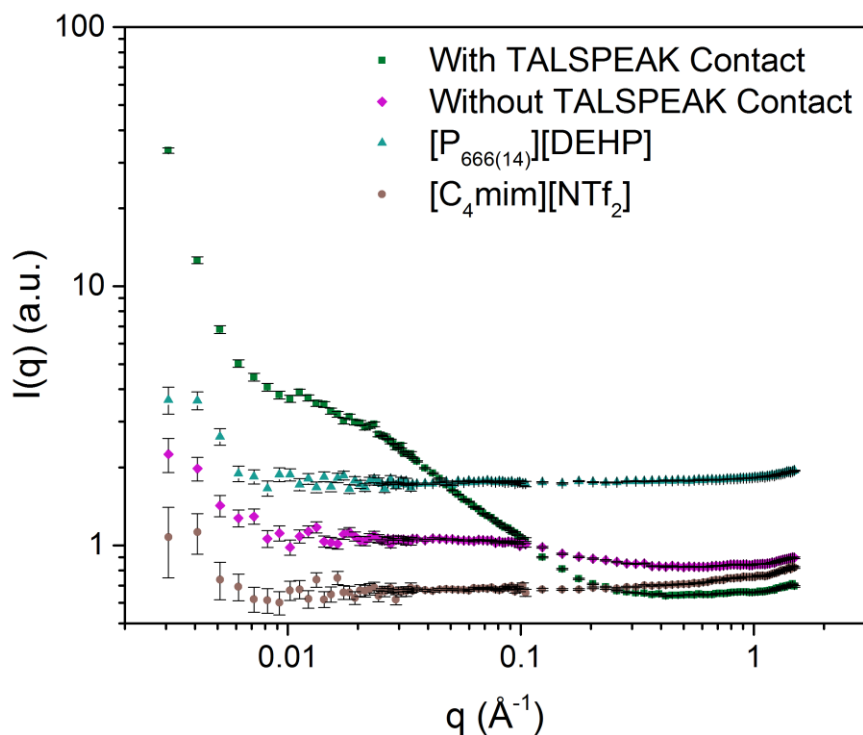

**Figure S1.** SANS data for  $[P_{666(14)}][DEHP]$  in  $[C_4mim][NTf_2]$  prior to contact with TALSPEAK simulant (grey diamonds), as well as the individual constituent ionic liquids,  $[P_{666(14)}][DEHP]$  (blue triangles) and  $[C_4mim][NTf_2]$  (brown circles). The data for  $[P_{666(14)}][DEHP]$  in  $[C_4mim][NTf_2]$  contacted with TALSPEAK containing 0.0025 M  $Lu(NO_3)_3$  (as plotted in Figure 1) are displayed as green squares for comparison. Data have not been artificially offset.

**Table S1.** Solid Cylinder Fit of SANS Data from Contact of  $[P_{666(14)}][DEHP]$  /  $[C_4mim][NTf_2]$  with TALSPEAK Simulant with 0.0025 M  $Lu(NO_3)_3$

| Length (Å)  | Radius (Å)       | Scale             | $\chi^2_v$ | $R_g$ (Å) |
|-------------|------------------|-------------------|------------|-----------|
| $171 \pm 2$ | $11.66 \pm 0.07$ | $0.049 \pm 0.001$ | 3.5        | 50        |

**Table S2.** Calculated Scattering Length Densities for Ionic Liquid Constituents

| Component                            | Molecular Formula                                            | Molar Weight (g mol <sup>-1</sup> ) | Density (g mL <sup>-1</sup> ) | Scattering Length Density (×10 <sup>-6</sup> Å <sup>-2</sup> ) |
|--------------------------------------|--------------------------------------------------------------|-------------------------------------|-------------------------------|----------------------------------------------------------------|
| Water                                | H <sub>2</sub> O                                             | 18.0                                | 1.00                          | -0.56                                                          |
| [P <sub>666(14)</sub> ] <sup>+</sup> | PC <sub>32</sub> H <sub>68</sub>                             | 483.4                               | 0.96                          | -0.44                                                          |
| [DEHP] <sup>-</sup>                  | PO <sub>4</sub> C <sub>8</sub> H <sub>18</sub>               | 209.1                               | 0.96                          | 0.39                                                           |
| [C <sub>4</sub> mim] <sup>+</sup>    | N <sub>2</sub> C <sub>8</sub> H <sub>15</sub>                | 139.1                               | 1.39                          | 0.95                                                           |
| [NTf <sub>2</sub> ] <sup>-</sup>     | NS <sub>2</sub> O <sub>4</sub> C <sub>2</sub> F <sub>6</sub> | 280.1                               | 1.39                          | 2.56                                                           |
| Water- <i>d</i>                      | D <sub>2</sub> O                                             | 20.0                                | 1.11                          | 6.39                                                           |

**Table S3** Refined Fit Parameters for Simultaneous Fit of Protiated and Deuterated Data Sets with Solid Cylinder Model

| Variable                                 | H <sub>2</sub> O                                 | D <sub>2</sub> O |
|------------------------------------------|--------------------------------------------------|------------------|
| Background (cm <sup>-1</sup> )           | 0.6617 ± 0.0002                                  | 0.6654 ± 0.0002  |
| Length (Å)                               | 217 ± 2                                          | 54.0 ± 0.4       |
| Radius (Å)                               | 11.98 ± 0.06                                     |                  |
| Scale                                    | 3.63 × 10 <sup>-13</sup> ± 3 × 10 <sup>-15</sup> |                  |
| ρ <sub>cylinder</sub> (Å <sup>-2</sup> ) | 0.639 ± 0.002                                    | 0.816 ± 0.002    |
| ρ <sub>solvent</sub> (Å <sup>-2</sup> )  | 1.7 (fixed)                                      |                  |

**Table S4.** Comparison of Fitted SANS Data from Contact of [P<sub>nnn(14)</sub>][DEHP] / [C<sub>4</sub>mim][NTf<sub>2</sub>] (*n* = 4, 6) with TALSPEAK Simulant Containing 0.0025 M Lu(NO<sub>3</sub>)<sub>3</sub>

| Sample                    | Length (Å) | Radius (Å)   | Scale         | χ <sup>2</sup> <sub>v</sub> | R <sub>g</sub> (Å) |
|---------------------------|------------|--------------|---------------|-----------------------------|--------------------|
| <i>n</i> = 6              | 171 ± 2    | 11.66 ± 0.07 | 0.049 ± 0.001 | 3.5                         | 50                 |
| <i>n</i> = 4 <sup>a</sup> | 21.9 ± 0.5 | 9.2 ± 0.2    | 0.059 ± 0.002 | 1.2                         | 11                 |

a. Fit using ellipsoidal form factor. The length column refers to the radius *a*, oriented along the rotation axis of the ellipsoid, while the radius column refers to radii *b* and *c*, oriented perpendicular to the rotation axis of the ellipsoid.

**Table S5.** Fit of SANS Data from Contact of [P<sub>666(14)</sub>][DEHP] / [C<sub>4</sub>mim][NTf<sub>2</sub>] with TALSPEAK Simulant Containing Different Lu(NO<sub>3</sub>)<sub>3</sub> Concentrations

| Sample   | Length (Å)               | Radius (Å)   | Scale         | χ <sup>2</sup> <sub>v</sub> | R <sub>g</sub> (Å) |
|----------|--------------------------|--------------|---------------|-----------------------------|--------------------|
| 0.0025 M | 171 ± 2                  | 11.66 ± 0.07 | 0.049 ± 0.001 | 3.5                         | 50                 |
| 0.025 M  | 165 (Fixed) <sup>a</sup> | 11.10 ± 0.07 | 0.051 ± 0.001 | 8.9                         | 49                 |
| 0 M      | 166 ± 2                  | 11.40 ± 0.07 | 0.050 ± 0.001 | 4.0                         | 49                 |

a. The length of the ellipsoid was fixed, to be consistent with values obtained for other samples. Allowing this parameter to vary freely resulted in a fit which was equally good statistically, but afforded physically questionable values, such as an unreasonably small radius.

**Table S6.** Fit Parameters for EXAFS data of Ionic Liquids Following Contact with TALSEPAK simulant.

|                                                        | 0.01 M Lu(NO <sub>3</sub> ) <sub>3</sub> | 0.025 M Lu(NO <sub>3</sub> ) <sub>3</sub> |
|--------------------------------------------------------|------------------------------------------|-------------------------------------------|
| <b>Coord. No.</b>                                      | 9.5 ± 2.4                                | 9.2 ± 2.4                                 |
| <b>Δ E<sub>0</sub></b>                                 | 7.3 ± 2.2                                | 7.8 ± 2.2                                 |
| <b>R (Å)</b>                                           | 2.24 ± 0.04                              | 2.24 ± 0.02                               |
| <b>σ<sup>2</sup> (× 10<sup>-3</sup> Å<sup>2</sup>)</b> | 9 ± 4                                    | 9 ± 4                                     |

**Table S7.** Water content as a function of metal concentration for [P<sub>666(14)</sub>][DEHP] in [C<sub>4</sub>mim][NTf<sub>2</sub>] as determined by Karl-Fisher titration

| <b>Sample</b>                              | <b>Water concentration (ppm)</b> |
|--------------------------------------------|----------------------------------|
| Before contact                             | 4506                             |
| No Lu(NO <sub>3</sub> ) <sub>3</sub>       | 6489                             |
| 0.0025 M Lu(NO <sub>3</sub> ) <sub>3</sub> | 10608                            |
| 0.025 M Lu(NO <sub>3</sub> ) <sub>3</sub>  | 14883                            |

## 6. References

- (1) Sun, X. Q.; Luo, H. M.; Dai, S. Solvent Extraction of Rare-Earth Ions Based on Functionalized Ionic Liquids. *Talanta* **2012**, *90*, 132-137.
- (2) Luo, H. M.; Dai, S.; Bonnesen, P. V. Solvent Extraction of Sr<sup>2+</sup> and Cs<sup>+</sup> Based on Room-Temperature Ionic Liquids Containing Monoaza-Substituted Crown Ethers. *Anal. Chem.* **2004**, *76*, 2773-2779.
- (3) Zhao, J. K.; Gao, C. Y.; Liu, D. The Extended Q-range Small-Angle Neutron Scattering Diffractometer at the SNS. *J. Appl. Crystallogr.* **2010**, *43*, 1068-1077.
- (4) Arnold, O.; Bilheux, J. C.; Borreguero, J. M.; Buts, A.; Campbell, S. I.; Chapon, L.; Doucet, M.; Draper, N.; Ferraz Leal, R.; Gigg, M. A.; Lynch, V. E.; Markvardsen, A.; Mikkelsen, D. J.; Mikkelsen, R. L.; Miller, R.; Palmen, K.; Parker, P.; Passos, G.; Perring, T. G.; Peterson, P. F.; Ren, S.; Reuter, M. A.; Savici, A. T.; Taylor, J. W.; Taylor, R. J.; Tolchenov, R.; Zhou, W.; Zikovsky, J. Mantid—Data Analysis and Visualization Package for Neutron Scattering and SR Experiments. *Nucl. Instrum. Methods Phys. Res., Sect. A* **2014**, *764*, 156-166.
- (5) Segre, C. U.; Leyarovska, N. E.; Chapman, L. D.; Lavender, W. M.; Plag, P. W.; King, A. S.; Kropf, A. J.; Bunker, B. A.; Kemner, K. M.; Dutta, P.; Duran, R. S.; Kaduk, J. In *The MRCAT Insertion Device Beamline at the Advanced Photon Source*, Synchrotron Radiation Instrumentation: Eleventh U.S. National Conference, New York, NY (USA), Pianetta, P., Ed. American Institute of Physics: New York, NY (USA), 2000; pp 419-422.
- (6) Ravel, B.; Newville, M. Athena, Artemis, Hephaestus: Data Analysis for X-ray Absorption Spectroscopy using IFEFFIT. *J. Synchrotron Radiat.* **2005**, *12*, 537-541.
- (7) Rehr, J. J.; Albers, R. C. Theoretical Approaches to X-ray Absorption Fine Structure. *Rev. Mod. Phys.* **2000**, *72*, 621-654.
- (8) Calvin, S. *XAFS for Everyone*. CRC Press: Boca Raton, FL, 2013.
